# Supplementary material
Source: publisher figshare collection journal article supplement (https://aacr.figshare.com/articles/dataset/_/23274789)
Supplement: Supplementary file 1 [file 41022426]

Supplement Table 1.

| Exon 19 deletion       | Osimertinib Line | Age | Sex | Smoking History | Disease Control | PFS (months) | TTD (months) | OS (months) |
|------------------------|------------------|-----|-----|-----------------|-----------------|--------------|--------------|-------------|
| <b>E746_T751&gt;A</b>  | 1                | 69  | M   | +               | +               | 19.6         | 27.3→        | 27.3→       |
|                        | 1                | 53  | M   | -               | +               | 17.3         | 19.4         | 21.7        |
|                        | 2 (T790M+)       | 65  | M   | -               | +               | 34.9         | 46.6         | 49.4        |
|                        | 2 (T790M+)       | 67  | F   | -               | +               | 14.0         | 29.6         | 41.7        |
|                        | 2 (T790M+)       | 79  | M   | +               | +               | 9.8          | 10.6         | 28.2        |
| <b>L747_S752del</b>    | 1                | 53  | F   | -               | +               | 26.6→        | 29.6→        | 29.6→       |
|                        | 1                | 50  | F   | -               | +               | 4.8          | 6.0          | 12.1→       |
|                        | 1                | 62  | F   | -               | +               | 33.8→        | 34.2→        | 34.2→       |
|                        | 2 (T790M+)       | 70  | F   | +               | +               | 13.3         | 22.0         | 26.6        |
|                        | 3 (T790M+)       | 65  | F   | -               | +               | 3.2          | 16.6         | 22.1        |
| <b>E746_P753&gt;VS</b> | 1                | 47  | M   | +               | +               | 11.2         | 15.4→        | 15.4→       |
|                        | 1                | 45  | F   | -               | -               | 2.7          | 2.8          | 2.9         |
|                        | 1                | 43  | F   | -               | +               | 19.2         | 25.5→        | 25.5→       |
|                        | 3 (T790M+)       | 65  | M   | -               | +               | 45.1         | 60.3→        | 60.5→       |
| <b>E746_T751&gt;V</b>  | 1                | 59  | F   | -               | +               | 16.4         | 16.6         | 22.1        |
|                        | 1                | 71  | F   | -               | +               | 23.1→        | 24.3→        | 24.3→       |
| <b>E746_T751&gt;VP</b> | 1                | 53  | F   | -               | +               | 26.6→        | 29.6→        | 29.6→       |
| <b>A750_I759&gt;PT</b> | 1                | 66  | F   | -               | +               | 8.3          | 8.8→         | 8.8→        |
| <b>E746_P753&gt;IS</b> | 1                | 73  | F   | -               | +               | 13.8→        | 16.5→        | 16.5→       |
| <b>L747_S752&gt;QH</b> | 1                | 56  | F   | +               | +               | 12.4→        | 16.0→        | 16.0→       |
| <b>S752_I759del</b>    | 1                | 60  | M   | -               | +               | 30.0         | 32.5         | 32.8→       |
| <b>T751_I759&gt;S</b>  | 1                | 72  | F   | -               | -               | 2.6          | 2.6          | 10.3        |
| <b>L747_A750del</b>    | 3 (T790M+)       | 72  | F   | +               | +               | 8.0          | 2.8          | 10.2→       |
| <b>L747_S752&gt;Q</b>  | 2 (T790M+)       | 65  | F   | -               | +               | 52.5→        | 53.6→        | 53.6→       |

Supplementary Table 1. Descriptive analysis of patient characteristics and outcomes for those with tumors harboring uncommon exon 19 deletions treated with osimertinib. Each variant represented  $\leq 2.5\%$  of the study cohort. Patients with + for “Smoking History” are those with either a prior or current smoking history. PFS=Progression free survival; OS= Overall survival; denotes patients who have not yet experienced an event for a time to event endpoint.
